# Supplementary material
Source: publisher figshare collection journal article supplement (https://acs.figshare.com/ndownloader/files/5814480)
Supplement: Supplementary file 1 [file 5814480]

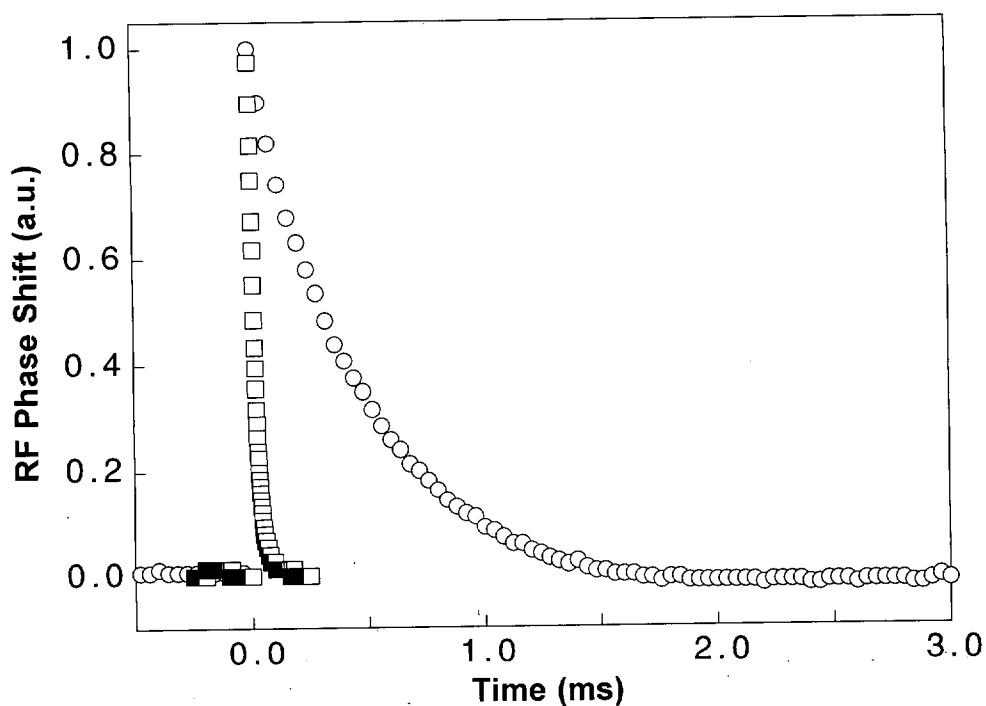

**Figure S1.** Time-resolved photoconductivity decay of hydrogen-terminated (111)-oriented n-type Si in contact with concentrated sulfuric acid (circles). Much more rapid conductivity decays were recorded after exposing this sample to air for 30 min (squares). A single-exponential fit to these decays (not shown) yielded a time constant of 458  $\mu\text{s}$  for the  $\text{H}_2\text{SO}_{4(\text{aq})}$ -immersed sample and 20  $\mu\text{s}$  for the air-exposed sample. Measurements were made under low-level injection conditions ( $1.3 \times 10^{-6} \text{ mJ cm}^{-2} \text{ pulse}^{-1}$ ;  $5.2 \times 10^{11}$  injected charge carriers  $\text{cm}^{-3} \text{ pulse}^{-1}$  in a 190  $\mu\text{m}$  thick sample).

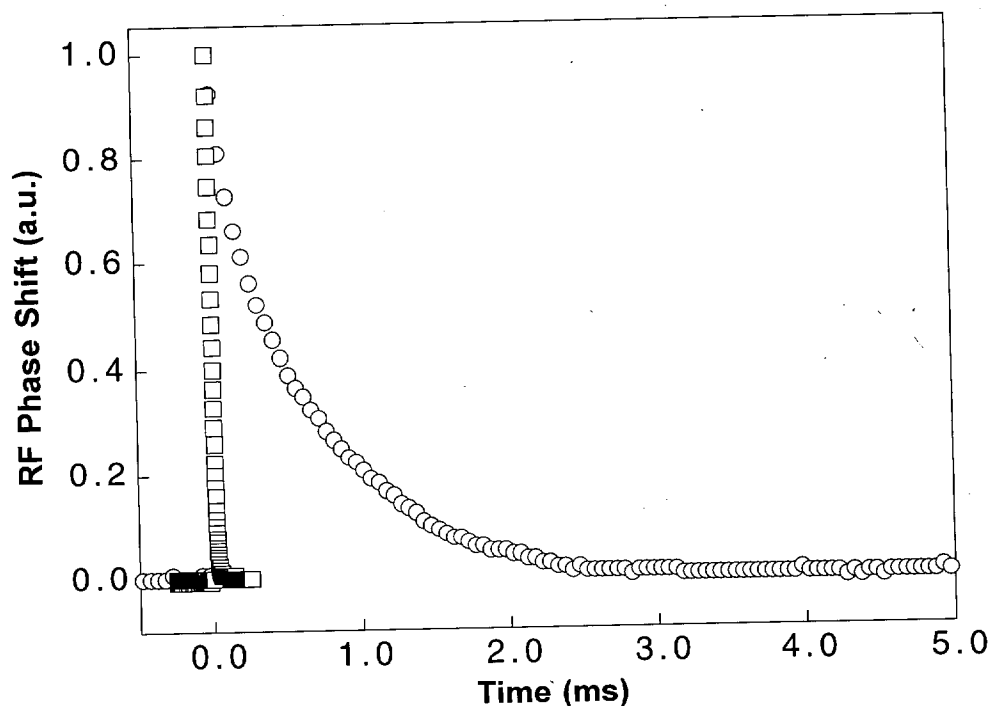

**Figure S2.** Time-resolved photoconductivity decay of  $\text{NH}_4\text{F}_{(\text{aq})}$ -etched (111)-oriented n-type Si in contact with  $\text{CH}_3\text{OH}$ -0.05 M  $\text{I}_2$  (circles) and in contact with  $\text{N}_{2(\text{g})}$  after immersion in  $\text{CH}_3\text{OH}$ - $\text{I}_2$  and a subsequent  $\text{CH}_3\text{OH}$  rinse (squares). A single-exponential fit to these decays (not shown) yielded a time constant of 657  $\mu\text{s}$  and 11  $\mu\text{s}$  for the  $\text{CH}_3\text{OH}$ - $\text{I}_2$ -immersed and the  $\text{N}_{2(\text{g})}$ -exposed samples, respectively. Measurements were made under high-level injection conditions ( $7.0 \times 10^{-4} \text{ mJ cm}^{-2} \text{ pulse}^{-1}$ ;  $2.7 \times 10^{14}$  injected charge carriers  $\text{cm}^{-3} \text{ pulse}^{-1}$  in a 195  $\mu\text{m}$  thick sample).

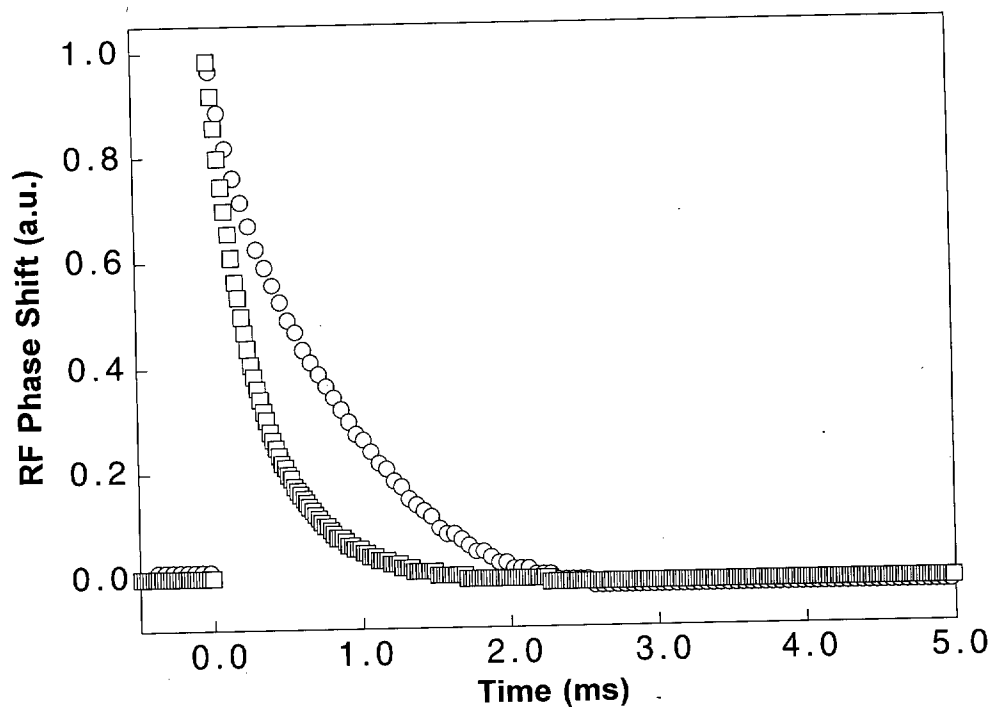

**Figure S3.** Time-resolved photoconductivity decay of  $\text{NH}_4\text{F}_{(\text{aq})}$ -etched (111)-oriented n-type Si in contact with  $\text{CH}_3\text{OH}$ -0.05 M  $\text{Fc}^{+/0}$  (circles) and in contact with  $\text{N}_{2(\text{g})}$  after immersion in  $\text{CH}_3\text{OH}$ -0.05 M  $\text{Fc}^{+/0}$  and a subsequent  $\text{CH}_3\text{OH}$  rinse (squares). A single-exponential fit to these decays (not shown) yielded a time constant of 741  $\mu\text{s}$  and 328  $\mu\text{s}$  for the  $\text{CH}_3\text{OH}$ -0.05 M  $\text{Fc}^{+/0}$ -immersed and the  $\text{N}_{2(\text{g})}$ -exposed samples, respectively. Measurements were made under high-level injection conditions ( $7.0 \times 10^{-4} \text{ mJ cm}^{-2} \text{ pulse}^{-1}$ ;  $2.7 \times 10^{14}$  injected charge carriers  $\text{cm}^{-3} \text{ pulse}^{-1}$  in a 197  $\mu\text{m}$  thick sample).

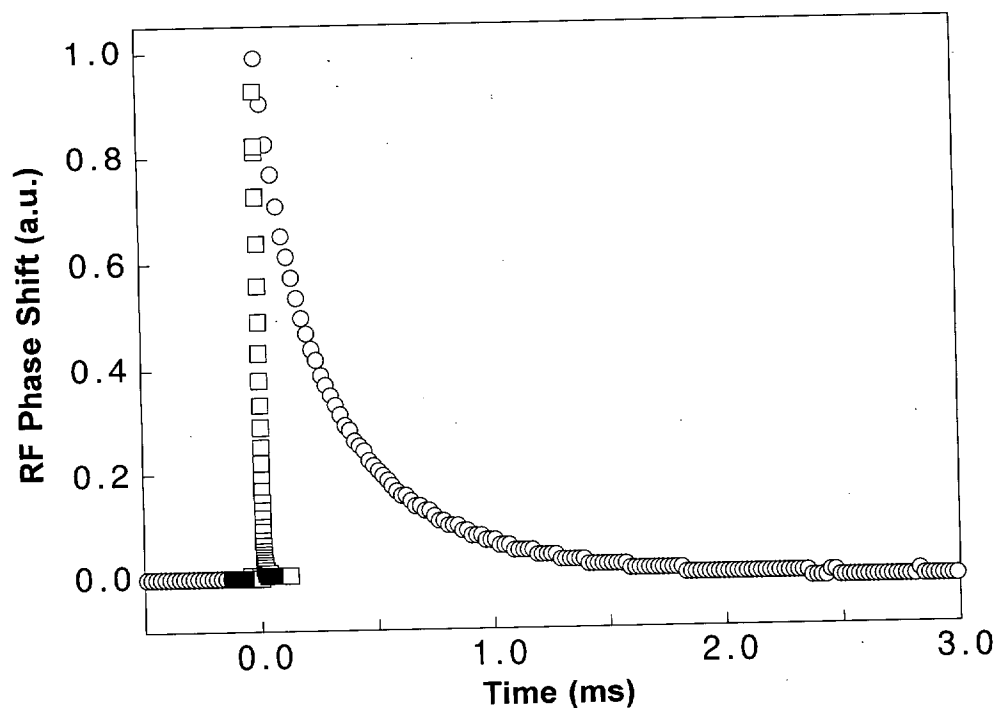

**Figure S4.** Time-resolved photoconductivity decay of  $\text{NH}_4\text{F}_{(\text{aq})}$ -etched (111)-oriented n-type Si in contact with THF-0.05 M  $\text{I}_2$  (circles) and in contact with  $\text{N}_{2(\text{g})}$  after immersion in THF- $\text{I}_2$  and a subsequent THF rinse (squares). A single-exponential fit to these decays (not shown) yielded a time constant of 341  $\mu\text{s}$  and 3.8  $\mu\text{s}$  for the THF- $\text{I}_2$ -immersed and the  $\text{N}_{2(\text{g})}$ -exposed samples, respectively. Measurements were made under high-level injection conditions ( $7.0 \times 10^{-4} \text{ mJ cm}^{-2} \text{ pulse}^{-1}$ ;  $2.7 \times 10^{14}$  injected charge carriers  $\text{cm}^{-3} \text{ pulse}^{-1}$  in a 195  $\mu\text{m}$  thick sample).

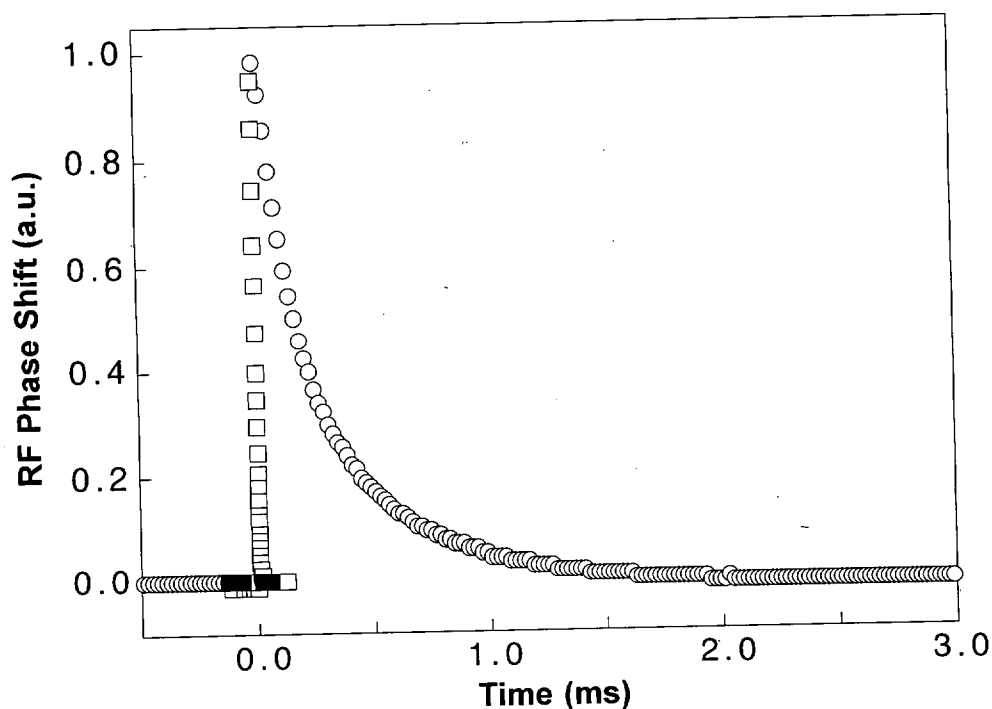

**Figure S5.** Time-resolved photoconductivity decay of  $\text{NH}_4\text{F}_{(\text{aq})}$ -etched (111)-oriented n-type Si in contact with THF-0.05 M Fc-0.005 M  $\text{Fc}^+$  (circles) and in contact with THF-0.05 M  $\text{Me}_{10}\text{Fc}$ -0.01M  $\text{Me}_{10}\text{Fc}^+$  (squares). A single-exponential fit to these decays (not shown) yielded time constants of 291  $\mu\text{s}$  and 3.2  $\mu\text{s}$  for the THF- $\text{Fc}^{+/0}$ -immersed and the THF- $\text{Me}_{10}\text{Fc}^{+/0}$ -immersed samples, respectively. Measurements were made under high-level injection conditions ( $7.0 \times 10^{-4} \text{ mJ cm}^{-2} \text{ pulse}^{-1}$ ;  $2.7 \times 10^{14}$  injected charge carriers  $\text{cm}^{-3} \text{ pulse}^{-1}$  in a 195  $\mu\text{m}$  thick sample).

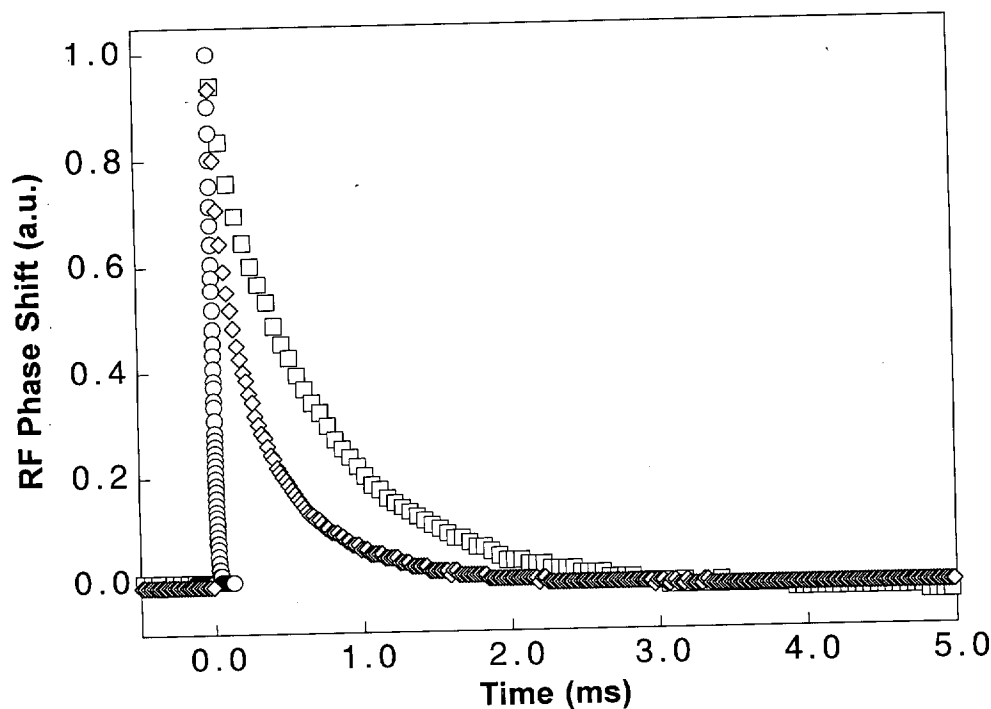

**Figure S6.** Time-resolved photoconductivity decay of  $\text{NH}_4\text{F}_{(\text{aq})}$ -etched (111)-oriented n-type Si in contact with  $\text{CH}_3\text{OH}$ -0.01 M  $\text{CoCp}_2^{+/0}$  (squares) and the subsequent exposure of the same sample to  $\text{N}_{2(\text{g})}$  (circles). A single-exponential fit to these decays (not shown) yielded time constants of 732  $\mu\text{s}$  and 9  $\mu\text{s}$ , respectively. Also shown is the photoconductivity decay for this sample in contact with  $\text{CH}_3\text{CN}$ -0.01 M  $\text{CoCp}_2^{+/0}$  (diamonds). A single-exponential fit to this decay yielded a time constant of 348  $\mu\text{s}$ . Measurements were made under high-level injection conditions ( $7.0 \times 10^{-4} \text{ mJ cm}^{-2} \text{ pulse}^{-1}$ ;  $1.7 \times 10^{14} \text{ injected charge carriers cm}^{-3} \text{ pulse}^{-1}$  in a 306  $\mu\text{m}$  thick sample).

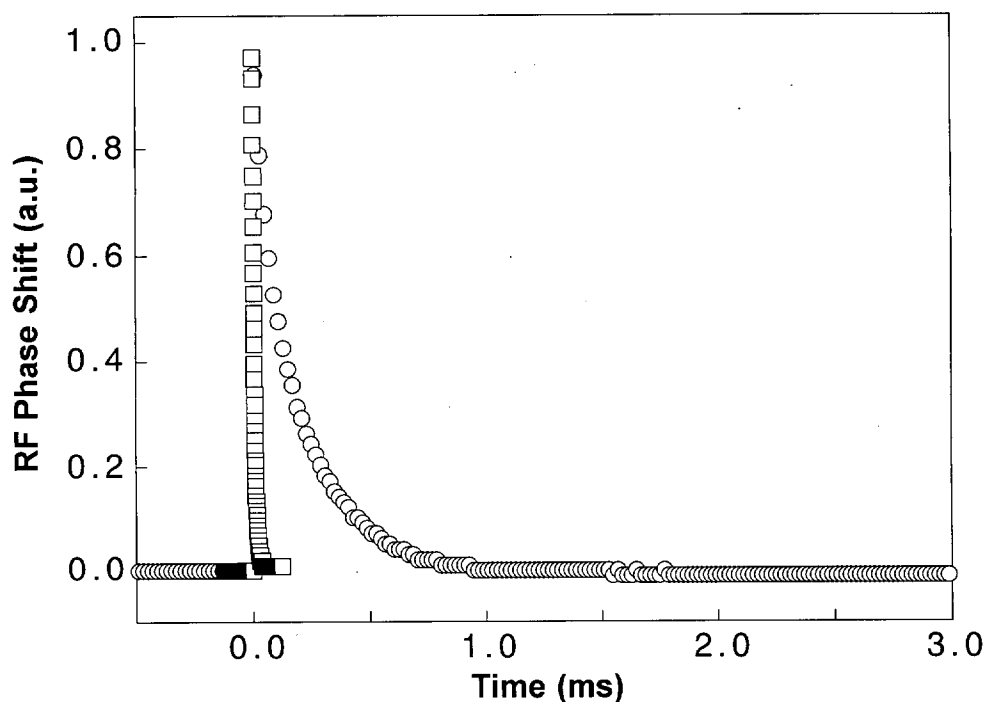

**Figure S7.** Time-resolved photoconductivity decay of air-oxidized (111)-oriented n-type Si in contact with  $\text{CH}_3\text{OH}$ -0.05 M  $\text{Fc}^{+/0}$  (circles) and in contact with  $\text{N}_{2(\text{g})}$  (squares). A single-exponential fit to these decays (not shown) yielded a time constant of 193  $\mu\text{s}$  and 6.7  $\mu\text{s}$  for the  $\text{CH}_3\text{OH}$ - $\text{Fc}^{+/0}$ -immersed and the  $\text{N}_{2(\text{g})}$ -exposed samples, respectively. Measurements were made under high-level injection conditions ( $7.0 \times 10^{-4} \text{ mJ cm}^{-2} \text{ pulse}^{-1}$ ;  $2.7 \times 10^{14}$  injected charge carriers  $\text{cm}^{-3} \text{ pulse}^{-1}$  in a 195  $\mu\text{m}$  thick sample).

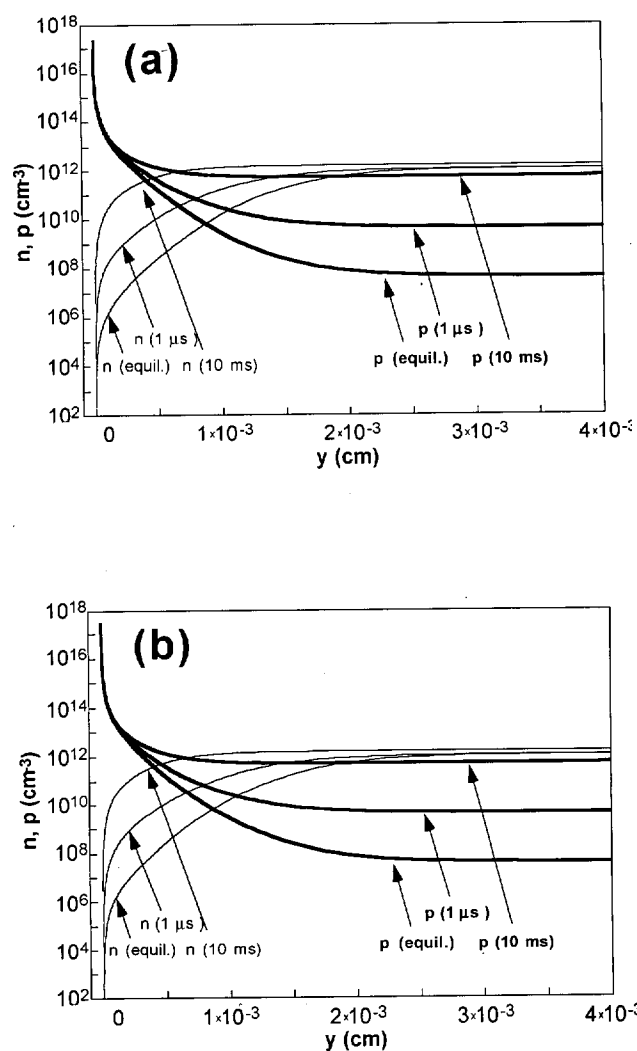

**Figure S8.** Charge carrier concentration profiles for Si/Me<sub>2</sub>Fc<sup>+0</sup> contacts (barrier height  $\Phi_B = 1.03$  V) under low-level injection conditions ( $3.3 \times 10^{11}$  injected charge carriers  $\text{cm}^{-3}$  pulse<sup>-1</sup>). Profiles are depicted at 1  $\mu\text{s}$  and at 10 ms after optical light excitation and at equilibrium (equil.). For clarity, only the region adjacent to the semiconductor/liquid contact ( $y = 0$  cm) is shown. (a) Simulation **XI**: surface trap density  $N_{T,s} = 1 \times 10^7$  traps  $\text{cm}^{-2}$ . Lifetime of holes (p) in the bulk equals 2.1 ms (b) Simulation **XII**: surface trap density  $N_{T,s} = 1 \times 10^{12}$  traps  $\text{cm}^{-2}$ . Lifetime of holes (p) in the bulk equals 2.1 ms.



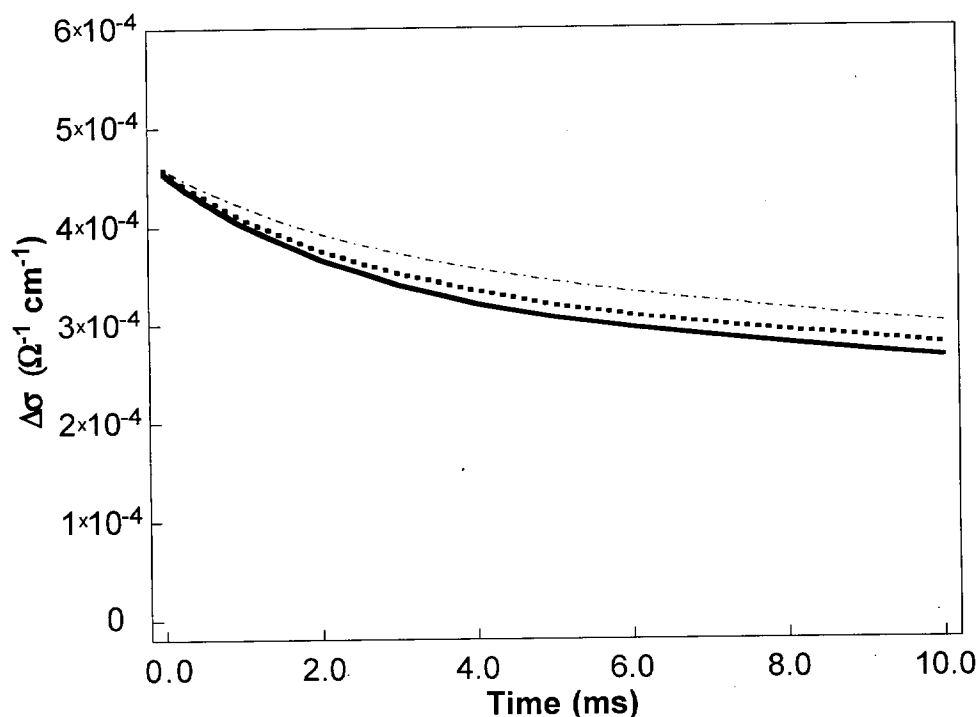

**Figure S9.** Plot of photoconductivity,  $\Delta\sigma$ , vs. time,  $t$ , for Si/Me<sub>2</sub>Fc<sup>+0</sup> contacts under low-level injection conditions ( $3.3 \times 10^{11}$  injected charge carriers cm<sup>-3</sup> pulse<sup>-1</sup>). Photoconductivities were calculated using eq 2. Results are shown for:  $N_{T,s} = 1 \times 10^{12}$  traps cm<sup>-2</sup> (solid line, **XI**),  $N_{T,s} = 1 \times 10^7$  traps cm<sup>-2</sup> (dotted line, **XII**), and  $N_{T,s} = 1 \times 10^7$  traps cm<sup>-2</sup> and a surface acceptor concentration  $[A] = 3 \times 10^{10}$  acceptor species cm<sup>-2</sup> (dash-dot line, **XIIa**). The photoconductivity decay did not follow a single exponential. A decay time of 2 ms was dominant, but obtaining a good fit to the photoconductivity decay required the addition of a series of exponentials having slower decay times than 2 ms.

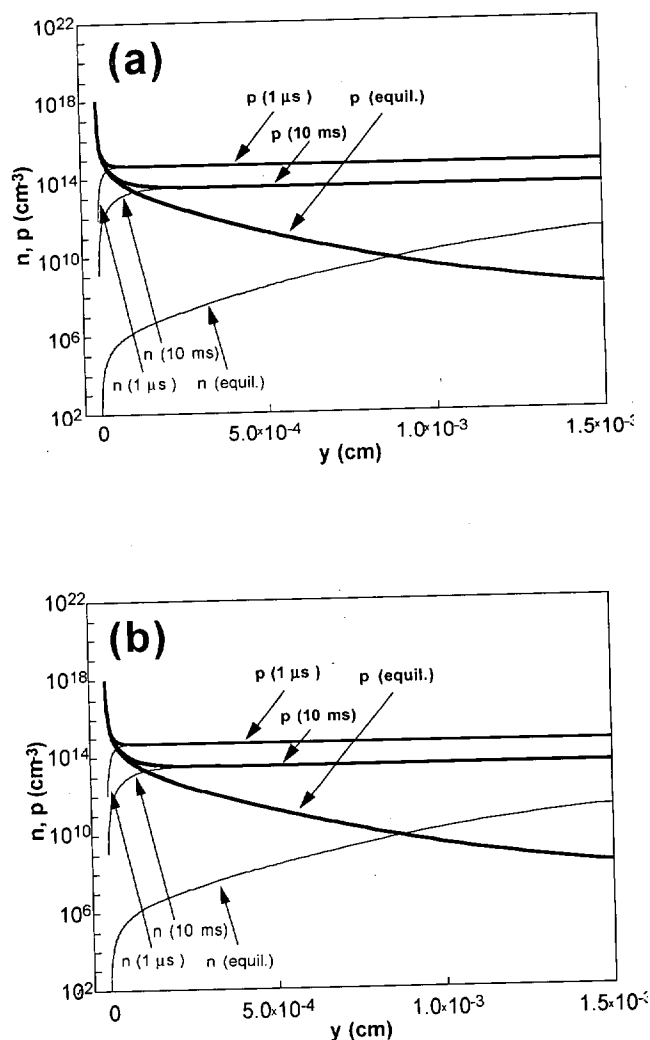

**Figure S10.** Charge carrier concentration profiles for Si/Me<sub>2</sub>Fc<sup>+/-0</sup> contacts (barrier height  $\Phi_B = 1.03$  V) under high-level injection conditions ( $2.3 \times 10^{14}$  injected charge carriers cm<sup>-3</sup> pulse<sup>-1</sup>). Profiles are depicted at 1  $\mu$ s and at 10 ms after optical light excitation and at equilibrium (equil.). For clarity, only the region adjacent to the semiconductor/liquid contact ( $y = 0$  cm) is shown. (a) Simulation **XIII**: surface trap density  $N_{T,s} = 1 \times 10^7$  traps cm<sup>-2</sup>. Lifetime of holes (p) in the bulk equals 3.7 ms (b) Simulation **XIV**: surface trap density  $N_{T,s} = 1 \times 10^{12}$  traps cm<sup>-2</sup>. Lifetime of holes (p) in the bulk equals 3.5 ms.

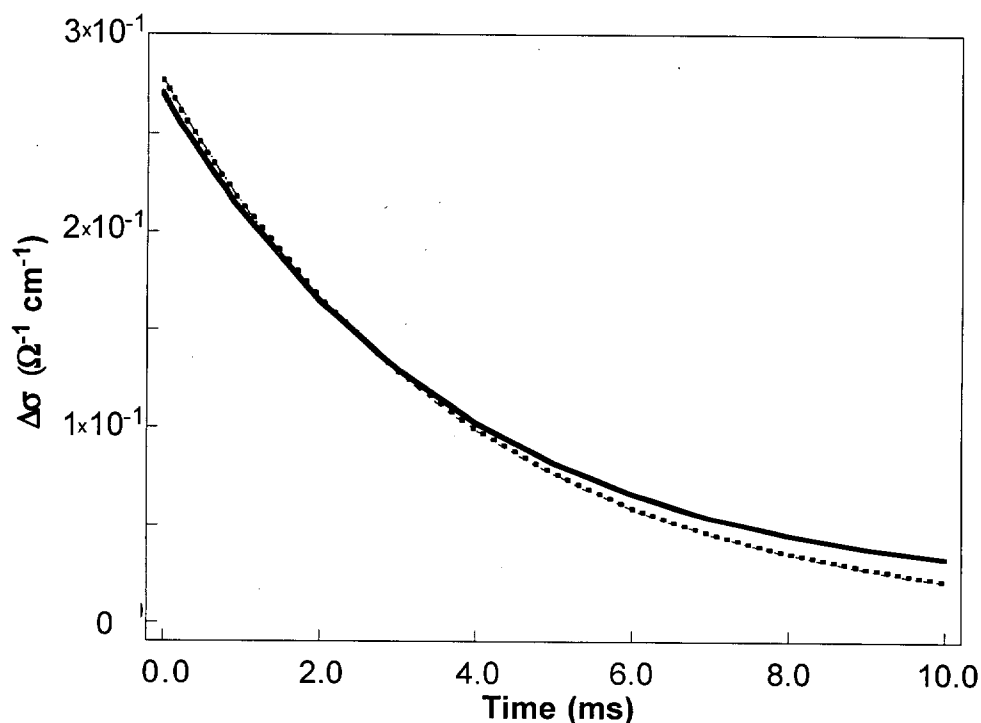

**Figure S11.** Plot of photoconductivity,  $\Delta\sigma$ , vs. time,  $t$ , for Si/Me<sub>2</sub>Fc<sup>+0</sup> contacts under high-level injection conditions ( $2.3 \times 10^{14}$  injected charge carriers cm<sup>-3</sup> pulse<sup>-1</sup>). Photoconductivities were calculated using eq 2. Results are shown for:  $N_{T,s} = 1 \times 10^7$  traps cm<sup>-2</sup> (dotted line, **XIII**),  $N_{T,s} = 1 \times 10^{12}$  traps cm<sup>-2</sup> (solid line, **XIV**), and  $N_{T,s} = 1 \times 10^7$  traps cm<sup>-2</sup> and a surface acceptor concentration  $[A] = 3 \times 10^{10}$  acceptor species cm<sup>-2</sup> (dash-dot line, **XIIIa**). Photoconductivity decays are single exponentials and have decay times of 3.9 ms (**XIII**), 3.7 ms (**XIV**), and 3.9 ms (**XIIIa**), respectively.

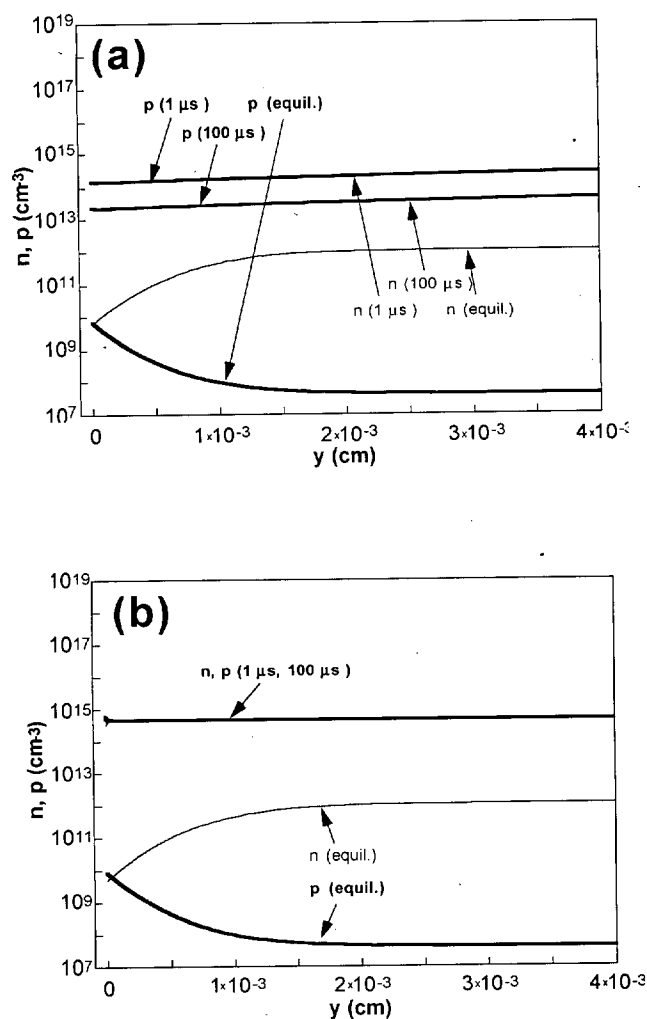

**Figure S12.** Charge carrier concentration profiles for Si/Me<sub>10</sub>Fc<sup>+ / 0</sup> contacts (barrier height  $\Phi_B = 0.56$  V) under high-level injection conditions ( $2.3 \times 10^{14}$  injected charge carriers  $\text{cm}^{-3} \text{ pulse}^{-1}$ ). Profiles are depicted at  $1 \mu\text{s}$  and at  $100 \mu\text{s}$  after optical light excitation and at equilibrium (equil.). For clarity, only the region adjacent to the semiconductor/liquid contact ( $y = 0$  cm) is shown. (a) Simulation XV: surface trap density  $N_{T,s} = 1 \times 10^{12} \text{ traps cm}^{-2}$ . Decay of holes did not follow a single exponential. (b) Simulation XVI: surface trap density  $N_{T,s} = 1 \times 10^7 \text{ traps cm}^{-2}$ . Lifetime of holes ( $p$ ) in the bulk equals 3.7 ms.

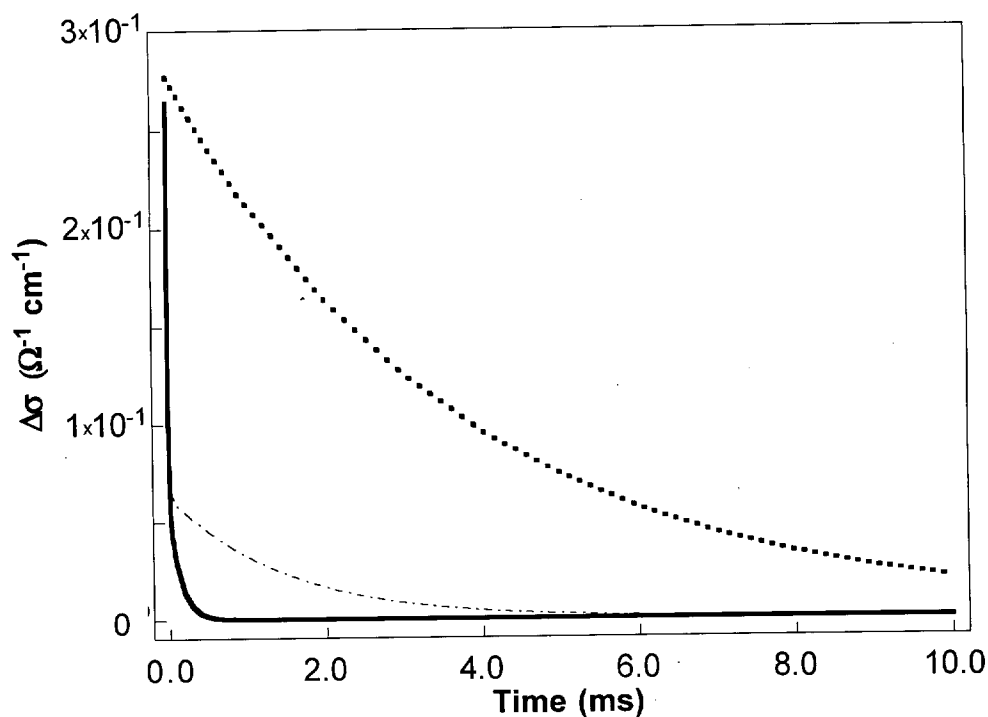

**Figure S13.** Plot of photoconductivity,  $\Delta\sigma$ , vs. time,  $t$ , for Si/Me<sub>10</sub>Fc<sup>+0</sup> contacts under high-level injection conditions ( $2.3 \times 10^{14}$  injected charge carriers cm<sup>-3</sup> pulse<sup>-1</sup>). Photoconductivities were calculated using eq 2. Results are shown for:  $N_{T,s} = 1 \times 10^{12}$  traps cm<sup>-2</sup> (solid line, **XV**),  $N_{T,s} = 1 \times 10^7$  traps cm<sup>-2</sup> (dotted line, **XVI**), and  $N_{T,s} = 1 \times 10^7$  traps cm<sup>-2</sup> and a surface acceptor concentration  $[A] = 3 \times 10^{10}$  acceptor species cm<sup>-2</sup> (dash-dot line, **XVIa**). Photoconductivity decay **XVI** is a single exponential with a decay time of 3.8 ms. Photoconductivity decays **XVIa** and **XV** did not follow a single exponential. The dominating decay times for **XVIa** and **XV** are on the order of  $\mu$ s.

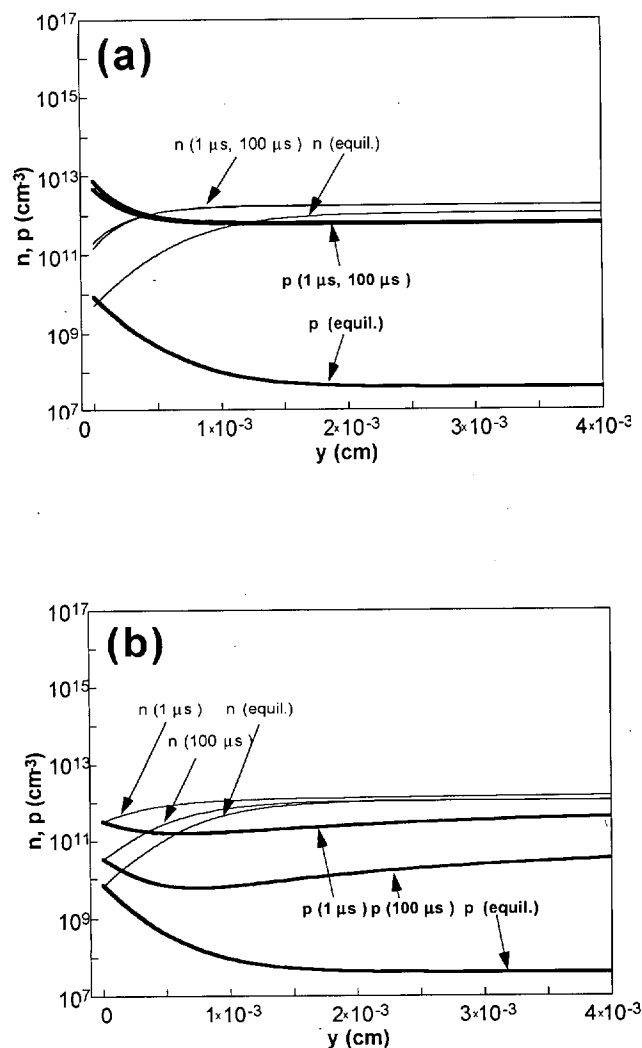

**Figure S14.** Charge carrier concentration profiles for Si/Me<sub>10</sub>Fc<sup>+0</sup> contacts (barrier height  $\Phi_B = 0.56$  V) under low-level injection conditions ( $3.3 \times 10^{11}$  injected charge carriers  $\text{cm}^{-3}$  pulse<sup>-1</sup>). Profiles are depicted at 1  $\mu\text{s}$  and at 100  $\mu\text{s}$  after optical light excitation and at equilibrium (equil.). For clarity, only the region adjacent to the semiconductor/liquid contact ( $y = 0$  cm) is shown. (a) Simulation XVII: surface trap density  $N_{T,s} = 1 \times 10^7 \text{ traps cm}^{-2}$ . Lifetime of holes ( $p$ ) at  $y = 9.5 \times 10^{-3}$  cm (not shown) equals 2.6 ms. (b) Simulation XVIII: surface trap density  $N_{T,s} = 1 \times 10^{12} \text{ traps cm}^{-2}$ . The decay of holes did not follow a single exponential. The dominating decay times are on the order of  $\mu\text{s}$ .

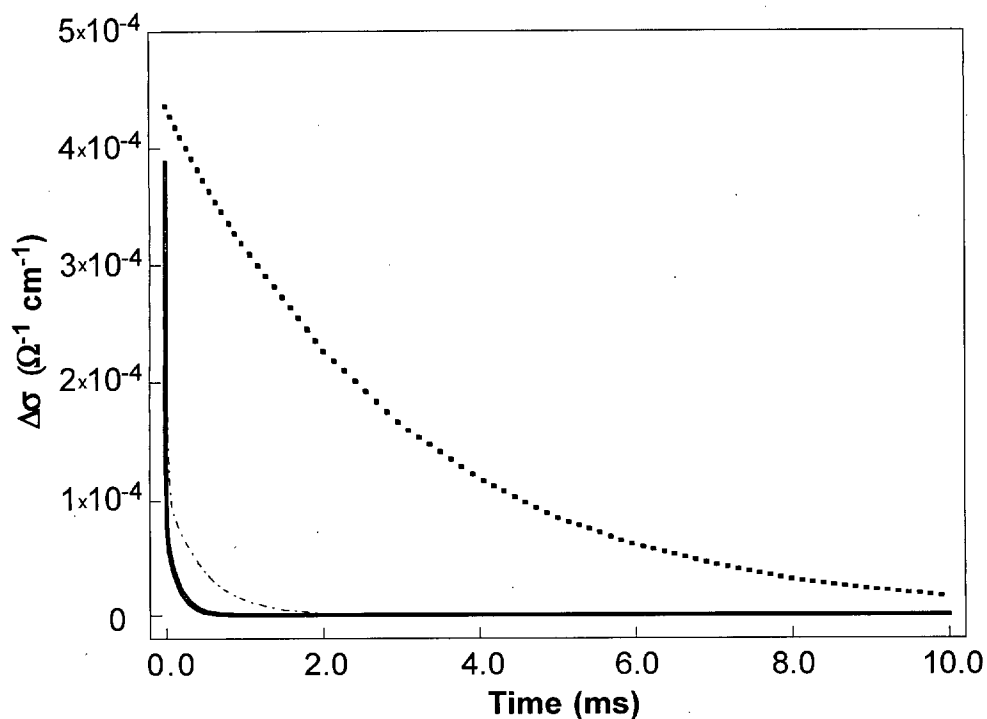

**Figure S15.** Plot of photoconductivity,  $\Delta\sigma$ , vs. time,  $t$ , for Si/Me<sub>10</sub>Fc<sup>+0</sup> contacts under low-level injection conditions ( $2.3 \times 10^{11}$  injected charge carriers cm<sup>-3</sup> pulse<sup>-1</sup>). Photoconductivities were calculated using eq 2. Results are shown for:  $N_{T,s} = 1 \times 10^7$  traps cm<sup>-2</sup> (dotted line, **XVII**),  $N_{T,s} = 1 \times 10^{12}$  traps cm<sup>-2</sup> (solid line, **XVIII**), and  $N_{T,s} = 1 \times 10^7$  traps cm<sup>-2</sup> and a surface acceptor concentration  $[A] = 3 \times 10^{10}$  acceptor species cm<sup>-2</sup> (dash-dot line, **XVIIa**). Photoconductivity decay **XVII** is a single exponential with a decay time of 3.1 ms. Photoconductivity decays **XVIIa** and **XVIII** could not be fitted by a single exponential decay. The dominating decay times are on the order of  $\mu$ s.
